# Supplementary material for: Using 3D printed physical models to monitor knowledge integration in biochemistry
Source: Royal Society of Chemistry journal article supplement (doi:10.1039/c8rp00075a), 2018-01-01
Supplement: c8rp00075a2.pdf [file c8rp00075a2.pdf]

### Representations of Amino Acids

Wedge  
& Dash

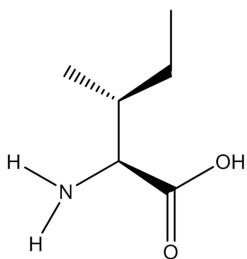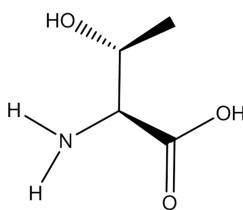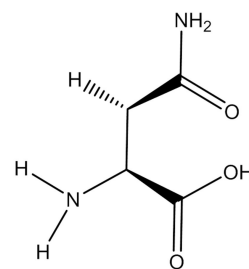

Surface

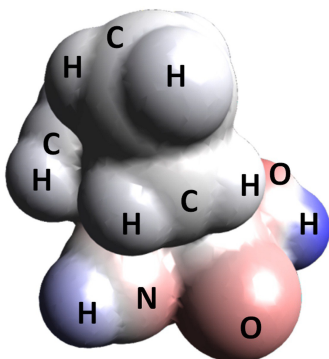

Isoleucine

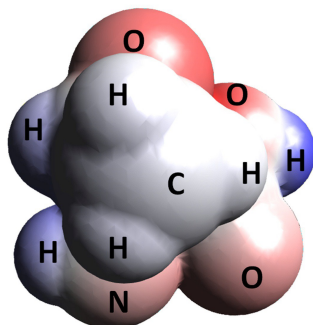

Threonine

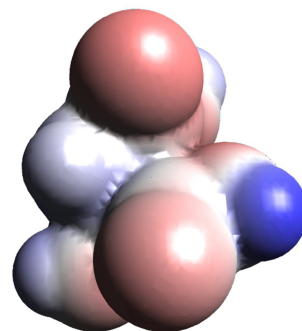

Asparagine

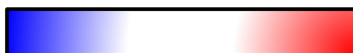

Electron Poor

Electron Rich
