# Supplementary material for: Using 3D printed physical models to monitor knowledge integration in biochemistry
Source: Royal Society of Chemistry journal article supplement (doi:10.1039/c8rp00075a), 2018-01-01
Supplement: c8rp00075a3.pdf [file c8rp00075a3.pdf]

### Representations of Substrates

Wedge  
& Dash

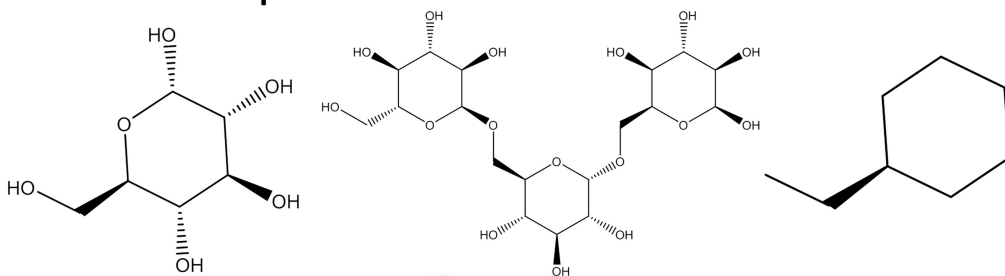

Surface

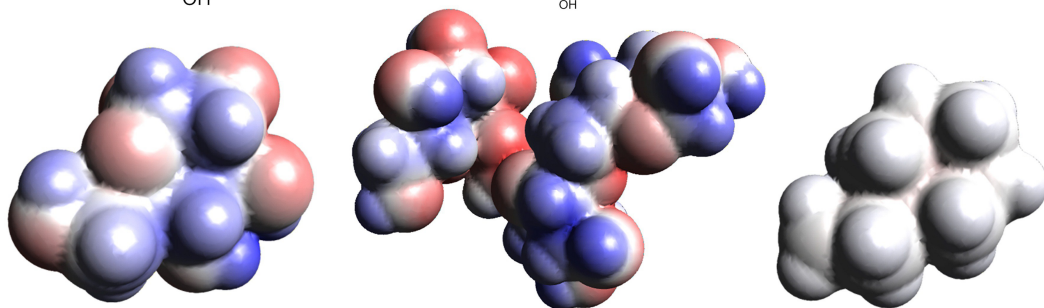

Glucose

Isomaltotriose

Ethylcyclohexane

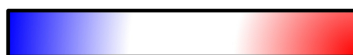

Electron Poor

Electron Rich
