# Supplementary figures and images for: Using 3D printed physical models to monitor knowledge integration in biochemistry
Source: Royal Society of Chemistry journal article supplement (doi:10.1039/c8rp00075a), 2018-01-01

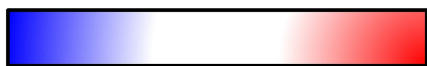

Electron Poor

Electron Rich

Supplement: c8rp00075a1.pdf [file c8rp00075a1.pdf]
